# Supplementary material for: Comparative Transcriptomics Analysis Reveals Rusty Grain Beetle’s Aggregation Pheromone Biosynthesis Mechanism in Response to Starvation
Source: MDPI journal article supplement (doi:10.3390/insects15020137), 2024-02-19
Supplement: s1 [file s1]

**Table S1.** Primers design of selected genes for RT-qPCR.

| Genes      | Primer Sequence                   |                                   |
|------------|-----------------------------------|-----------------------------------|
| ARF1       | Forward:<br>GATGCCGTCCTGTTGATTTT  | Reverse:<br>GGCCCAGCTTGTCTGTTATC  |
| HMGR       | Forward:<br>TCGCCTGCTTGTCGGTTAT   | Reverse:<br>CATACCTGTGTGCGTGGAC   |
| Desaturase | Forward: TGCTTATTTGCACGCCAT<br>CG | Reverse: TCGGTCTCGCTGTACTT<br>GTG |
| FPPS       | Forward: TACCCGGCAAAAATGTT<br>CGT | Reverse:<br>CCTTGGCCACGATATAACTCC |

Note: The primer sequences of ARF1 were followed by [32].

**Table S2.** Statistics of the overall sequences

| Categories       | Transcript | Unigene |
|------------------|------------|---------|
| Sequence Number  | 125338     | 42389   |
| Max. Length (bp) | 32626      | 32626   |
| Mean Length (bp) | 1558.19    | 1233.27 |
| N50 (bp)         | 2458       | 2212    |
| N50 Sequence No. | 22645      | 6340    |
| N90 (bp)         | 657        | 449     |
| N90 Sequence No. | 81323      | 28021   |
| GC%              | 36.33      | 35.90   |

**Table S3.** Annotations of the overall sequences

| Database Number Percentage | Database Percentage | Number | Database Number Percentage |
|----------------------------|---------------------|--------|----------------------------|
| NR                         | 16364               |        | 38.60                      |
| GO                         | 12078               |        | 28.49                      |
| KEGG                       | 9570                |        | 22.58                      |
| Pfam                       | 11649               |        | 27.48                      |
| eggNOG                     | 15674               |        | 36.98                      |
| Swissprot                  | 12730               |        | 30.03                      |
| In all database            | 6474                |        | 15.27                      |

**Table S4.** The most significantly different expression pathway of the KEGG pathway analysis for starved vs normally fed male beetles.

| Pathway ID | Pathway                          | DEG_number | total_number | p-Value                | FDR                    |
|------------|----------------------------------|------------|--------------|------------------------|------------------------|
| ko03040    | Spliceosome                      | 60         | 207          | $6.37 \times 10^{-10}$ | $9.91 \times 10^{-08}$ |
| ko00520    | Amino sugar and nucleotide sugar | 39         | 107          | $5.06 \times 10^{-10}$ | $9.91 \times 10^{-08}$ |

|         |                                                            |    |     |                        |                        |  |
|---------|------------------------------------------------------------|----|-----|------------------------|------------------------|--|
|         | metabolism                                                 |    |     |                        |                        |  |
| ko00500 | Starch and sucrose metabolism                              | 25 | 69  | $7.44 \times 10^{-07}$ | $7.72 \times 10^{-05}$ |  |
| ko03050 | Proteasome                                                 | 23 | 69  | $1.04 \times 10^{-05}$ | 0.00081                |  |
| ko03008 | Ribosome biogenesis in eukaryotes                          | 33 | 121 | $1.89 \times 10^{-05}$ | 0.0012                 |  |
| ko03430 | Mismatch repair                                            | 13 | 30  | $3.95 \times 10^{-05}$ | 0.0020                 |  |
| ko03030 | DNA replication                                            | 18 | 53  | $7.10 \times 10^{-05}$ | 0.0032                 |  |
| ko04910 | Insulin signaling pathway                                  | 39 | 167 | 0.00015                | 0.0060                 |  |
| ko05134 | Legionellosis                                              | 20 | 67  | 0.00022                | 0.0076                 |  |
|         | Glycosphingolipid biosynthesis - ganglio series            |    |     |                        |                        |  |
| ko00604 |                                                            | 6  | 9   | 0.00028                | 0.0087                 |  |
| ko04612 | Antigen processing and presentation                        | 25 | 95  | 0.00034                | 0.0097                 |  |
| ko04141 | Protein processing in endoplasmic reticulum                | 44 | 209 | 0.00069                | 0.017                  |  |
| ko00052 | Galactose metabolism                                       | 18 | 62  | 0.00065                | 0.017                  |  |
| ko04213 | Longevity regulating pathway - multiple species            | 23 | 91  | 0.0011                 | 0.024                  |  |
|         | Glycosphingolipid biosynthesis - globo and isoglobo series |    |     |                        |                        |  |
| ko00603 |                                                            | 6  | 11  | 0.0012                 | 0.025                  |  |

---

**Table S5.** Information of top 10 up-regulated and down-regulated expressed genes (DEGs) in different comparisons.

| Gene ID | Description                                                   | log <sub>2</sub><br>Fold<br>Change | adjustedp-<br>Value     | Best<br>Hit              |
|---------|---------------------------------------------------------------|------------------------------------|-------------------------|--------------------------|
| DN36036 | Prostatic acid phosphatase                                    | -5.80                              | 0.0010                  | Tribolium castaneum      |
| DN14259 | salivary protein                                              | -2.59                              | 1.75× 10 <sup>-07</sup> | Phlebotomus ariasi       |
| DN63954 | putative sugar transporter 25                                 | -2.56                              | 0.00082                 | Phaedon cochleariae      |
| DN14137 | Protein phosphatase 2C containing protein                     | -2.55                              | 9.92× 10 <sup>-05</sup> | Brugia malayi            |
| DN31519 | insulin-degrading enzyme                                      | -2.38                              | 4.95× 10 <sup>-14</sup> | Tribolium castaneum      |
| DN21681 | 3-phosphoinositide-dependent protein kinase 1-like isoform X1 | -2.25                              | 0.00080                 | Priapulus caudatus       |
| DN27944 | insulin-degrading enzyme                                      | -2.21                              | 5.25× 10 <sup>-09</sup> | Tribolium castaneum      |
| DN63976 | alternative oxidase, mitochondrial-like                       | -2.19                              | 0.0019                  | Amphimedon queenslandica |
| DN59540 | Alcohol dehydrogenase [NADP(+)]                               | -2.06                              | 6.60× 10 <sup>-06</sup> | Strongyloides ratti      |
| DN33569 | Serine/threonine-protein kinase Nek8                          | -1.91                              | 0.0010                  | Crassostrea gigas        |
| DN9923  | glycoside hydrolase family 1                                  | 5.90                               | 4.72× 10 <sup>-06</sup> | Phyllotreta striolata    |
| DN8951  | cytochrome P450 monooxygenase                                 | 4.89                               | 0.00025                 | Tribolium castaneum      |
| DN26488 | glutamate receptor ionotropic, kainate 2 isoform X6           | 4.37                               | 0.023                   | Tribolium castaneum      |
| DN3904  | chitinase                                                     | 4.27                               | 2.17× 10 <sup>-58</sup> | Monochamus alternatus    |
| DN14148 | transmembrane protease serine 9                               | 4.22                               | 0.030                   | Tribolium castaneum      |
| DN11370 | Potassium channel subfamily T member 1-like Protein           | 4.18                               | 0.021                   | Tribolium castaneum      |
| DN13853 | vitellogenin receptor                                         | 4.08                               | 0.042                   | Tribolium                |

|         |                                    |      |                         |                                      |
|---------|------------------------------------|------|-------------------------|--------------------------------------|
| DN812   | Lipase 3                           | 3.83 | 1.55× 10 <sup>-29</sup> | castaneum<br>Zootermopsis nevadensis |
| DN12993 | cytochrome P450 6bq17              | 3.72 | 0.013                   | Leptinotarsa decemlineata            |
| DN39974 | general odorant-binding protein 72 | 3.76 | 0.012                   | Tribolium castaneum                  |

**Table S6.** All the putative genes in pheromone biosynthesis via the MVA pathway in *C. ferrugineus*

| Sequence Name | Length(bp) | Description                                            | Best blast Hit                                                                                                                 |
|---------------|------------|--------------------------------------------------------|--------------------------------------------------------------------------------------------------------------------------------|
| DN8502        | 2684       | 3-hydroxy-3-methylglutaryl coenzyme A synthase         | gi 859132804 gb AKO63317.1  3-hydroxy-3-methylglutaryl coenzyme A synthase ( <i>Leptinotarsa decemlineata</i> )                |
| DN14          | 3765       | 3-hydroxy-3-methylglutaryl coenzyme A reductase 2      | gi 859132811 gb AKO63319.1  3-hydroxy-3-methylglutaryl coenzyme A reductase 2 ( <i>Leptinotarsa decemlineata</i> )             |
| DN13258       | 2520       | acetyl-CoA acetyltransferase 2                         | gi 983657959 gb AMB37467.1  acetyl-CoA acetyltransferase 2 ( <i>Leptinotarsa decemlineata</i> )                                |
| DN7232        | 1958       | acetyl-CoA acetyltransferase, mitochondrial isoform X1 | gi 189234785 ref XP_975008.2  PREDICTED: acetyl-CoA acetyltransferase, mitochondrial isoform X1 ( <i>Tribolium castaneum</i> ) |
| DN4867        | 1986       | mevalonate kinase                                      | gi 859132814 gb AKO63320.1  mevalonate kinase ( <i>Leptinotarsa decemlineata</i> )                                             |
| DN1057        | 1828       | diphosphomevalonate decarboxylase                      | gi 385200014 gb AFI45055.1  diphosphomevalonate decarboxylase ( <i>Dendroctonus ponderosae</i> )                               |
| DN14040       | 2079       | geranylgeranyl diphosphate synthase                    | gi 549439117 gb AGX25357.1  geranylgeranyl diphosphate synthase ( <i>Pissodes strobi</i> )                                     |
| DN43621       | 412        | isopentenyl diphosphate synthase                       | gi 943360326 gb ALL35402.1  isopentenyl diphosphate synthase ( <i>Psylliodes chrysocephalus</i> )                              |
| DN34563       | 1439       | isoprenyl diphosphate synthase                         | gi 449139004 gb AGE89831.1  isoprenyl diphosphate synthase                                                                     |

|         |      |                                       |                                                                                                                                   |
|---------|------|---------------------------------------|-----------------------------------------------------------------------------------------------------------------------------------|
|         |      |                                       | ( <i>Phaedon cochleariae</i> )                                                                                                    |
| DN17749 | 1283 | isopentenyl<br>diphosphate synthase   | gi 943360322 gb ALL35400.1 <br>isopentenyl diphosphate synthase<br>( <i>Phyllotreta striolata</i> )                               |
| DN17069 | 854  | farnesyl<br>pyrophosphate<br>synthase | gi 282158091 ref NP_001164089.1 <br>farnesyl pyrophosphate synthase<br>( <i>Tribolium castaneum</i> )                             |
| DN3052  | 2122 | farnesyl<br>pyrophosphate<br>synthase | gi 1008444024 ref XP_015836774.1 <br>  PREDICTED: farnesyl<br>pyrophosphate synthase isoform X1<br>( <i>Tribolium castaneum</i> ) |
| DN34020 | 437  | cytochrome P450-4c                    | gi 936578848 ref XP_014204067.1 <br>PREDICTED: cytochrome P450 4C1-<br>like ( <i>Copidosoma floridanum</i> )                      |
| DN57140 | 387  | Cytochrome P450-6a                    | gi 1004399086 gb KYB27039.1 <br>Cytochrome P450 6a2-like Protein<br>( <i>Tribolium castaneum</i> )                                |
| DN11348 | 539  | Cytochrome P450-6a                    | gi 91084707 ref XP_969633.1 <br>PREDICTED: probable cytochrome<br>P450 6a23 ( <i>Tribolium castaneum</i> )                        |
| DN9170  | 1751 | cytochrome P450-4c                    | gi 91094839 ref XP_971612.1 <br>PREDICTED: cytochrome P450 4C1<br>( <i>Tribolium castaneum</i> )                                  |
| DN1125  | 319  | cytochrome P450 9e                    | gi 91088761 ref XP_975385.1 <br>PREDICTED: cytochrome P450 9e2<br>( <i>Tribolium castaneum</i> )                                  |
| DN25899 | 463  | cytochrome P450 9e                    | gi 1008450276 ref XP_015838490.1 <br>  PREDICTED: cytochrome P450<br>9e2-like ( <i>Tribolium castaneum</i> )                      |
| DN14817 | 414  | cytochrome P450 6b                    | gi 478734979 gb AGJ51945.1 <br>cytochrome P450 CYP6BQ22<br>( <i>Dastarcus helophoroides</i> )                                     |

**Table S7.** All the putative genes in pheromone biosynthesis via the FAS pathway in *C. ferrugineus*

| Sequence Name | Length | Description               | Best blast Hit                                                                                                        |
|---------------|--------|---------------------------|-----------------------------------------------------------------------------------------------------------------------|
| DN26988       | 5727   | acetyl-CoA<br>carboxylase | gi 919000753 ref XP_013405631.1 <br>PREDICTED: acetyl-CoA<br>carboxylase-like, partial ( <i>Lingula<br/>anatina</i> ) |
| DN2984        | 5449   | acetyl-CoA<br>carboxylase | gi 919033674 ref XP_013400502.1 <br>PREDICTED: acetyl-CoA<br>carboxylase-like isoform X1 ( <i>Lingula</i>             |

|         |      |                           |                                                                                                                            |
|---------|------|---------------------------|----------------------------------------------------------------------------------------------------------------------------|
|         |      |                           | <i>anatina</i> )                                                                                                           |
| DN4246  | 8236 | acetyl-CoA<br>carboxylase | gi 642926044 ref XP_008194742.1 <br>PREDICTED: acetyl-CoA<br>carboxylase isoform X4 ( <i>Tribolium<br/>castaneum</i> )     |
| DN451   | 7614 | fatty acid<br>synthase    | gi 998254491 gb AMK38868.1 <br>fatty acid synthase 1 ( <i>Colaphellus<br/>bowringi</i> )                                   |
| DN451   | 448  | fatty acid<br>synthase    | gi 478250393 gb ENN70888.1 <br>hypothetical protein YQE_12293,<br>partial ( <i>Dendroctonus ponderosae</i> )               |
| DN5055  | 7842 | fatty acid<br>synthase    | gi 546672885 gb ERL84608.1 <br>hypothetical protein D910_02036<br>( <i>Dendroctonus ponderosae</i> )                       |
| DN13200 | 2686 | fatty acid<br>synthase    | gi 936579093 ref XP_014204155.1 <br>PREDICTED: fatty acid synthase-like<br>isoform X1 ( <i>Copidosoma floridanum</i> )     |
| DN13306 | 898  | fatty acid<br>synthase    | gi 478252126 gb ENN72557.1 <br>hypothetical protein YQE_10897,<br>partial ( <i>Dendroctonus ponderosae</i> )               |
| DN13809 | 4400 | fatty acid<br>synthase    | gi 833654169 gb AKM28424.1 <br>fatty acid synthase 2 ( <i>Aphis gossypii</i> )                                             |
| DN14149 | 720  | fatty acid<br>synthase    | gi 478250393 gb ENN70888.1 <br>hypothetical protein YQE_12293,<br>partial ( <i>Dendroctonus ponderosae</i> )               |
| DN14585 | 637  | fatty acid<br>synthase    | gi 808127224 ref XP_012166572.1 <br>PREDICTED: LOW QUALITY<br>PROTEIN: fatty acid synthase<br>( <i>Bombus terrestris</i> ) |
| DN17237 | 853  | fatty acid<br>synthase    | gi 350407733 ref XP_003488176.1 <br>PREDICTED: fatty acid synthase<br>( <i>Bombus impatiens</i> )                          |
| DN20777 | 1243 | fatty acid<br>synthase    | gi 1008441829 ref XP_015836196.1 <br>PREDICTED: fatty acid synthase<br>( <i>Tribolium castaneum</i> )                      |
| DN2296  | 6583 | fatty acid<br>synthase    | gi 642914795 ref XP_008190356.1 <br>PREDICTED: fatty acid synthase<br>( <i>Tribolium castaneum</i> )                       |
| DN24241 | 430  | fatty acid<br>synthase    | gi 827552646 ref XP_012548082.1 <br>PREDICTED: LOW QUALITY<br>PROTEIN: p270 isoform X1 ( <i>Bombyx<br/>mori</i> )          |
| DN24375 | 356  | fatty acid<br>synthase    | gi 939666222 ref XP_014280344.1 <br>PREDICTED: fatty acid synthase-like                                                    |

|                              |      |                              |                                                                                                                                                |
|------------------------------|------|------------------------------|------------------------------------------------------------------------------------------------------------------------------------------------|
|                              |      |                              | ( <i>Halyomorpha halys</i> )                                                                                                                   |
| DN24459                      | 327  | fatty acid synthase          | gi 998254491 gb AMK38868.1  fatty acid synthase 1 ( <i>Colaphellus bowringi</i> )                                                              |
| DN26951                      | 397  | fatty acid synthase          | gi 970895185 ref XP_015113057.1  PREDICTED: fatty acid synthase-like ( <i>Diachasma alloeum</i> )                                              |
| DN27948                      | 1080 | fatty acid synthase          | gi 478250393 gb ENN70888.1  hypothetical protein YQE_12293, partial ( <i>Dendroctonus ponderosae</i> )                                         |
| DN3683                       | 8015 | fatty acid synthase          | gi 642910328 ref XP_008200285.1  PREDICTED: fatty acid synthase ( <i>Tribolium castaneum</i> )                                                 |
| DN37960                      | 1788 | fatty acid synthase          | gi 972194346 ref XP_015179002.1  PREDICTED: fatty acid synthase ( <i>Polistes dominula</i> )                                                   |
| DN38748                      | 329  | fatty acid synthase          | gi 998254491 gb AMK38868.1  fatty acid synthase 1 ( <i>Colaphellus bowringi</i> )                                                              |
| fatty acid transport protein |      |                              |                                                                                                                                                |
| DN805                        | 2935 | fatty acid transport protein | gi 642923280 ref XP_008193688.1  PREDICTED: long-chain fatty acid transport protein 4 isoform X1 ( <i>Tribolium castaneum</i> )                |
| DN18413                      | 396  | fatty acid transport protein | gi 642923280 ref XP_008193688.1  PREDICTED: long-chain fatty acid transport protein 4 isoform X1 ( <i>Tribolium castaneum</i> )                |
| DN2523                       | 2017 | fatty acid transport protein | gi 91086105 ref XP_967675.1  PREDICTED: long-chain fatty acid transport protein 4 ( <i>Tribolium castaneum</i> )                               |
| Acyl-CoA dehydrogenase       |      |                              |                                                                                                                                                |
| DN2581                       | 3478 | Acyl-CoA dehydrogenase       | gi 642938637 ref XP_008197587.1  PREDICTED: short/branched chain specific acyl-CoA dehydrogenase, mitochondrial ( <i>Tribolium castaneum</i> ) |
| DN348                        | 1959 | Acyl-CoA dehydrogenase       | gi 91079744 ref XP_970506.1  PREDICTED: probable medium-chain specific acyl-CoA dehydrogenase, mitochondrial ( <i>Tribolium castaneum</i> )    |
| DN5059                       | 2150 | Acyl-CoA dehydrogenase       | gi 642915063 ref XP_008190394.1  PREDICTED: acyl-CoA                                                                                           |

|                                 |      |                                 |                                                                                                                                                   |
|---------------------------------|------|---------------------------------|---------------------------------------------------------------------------------------------------------------------------------------------------|
|                                 |      | se                              | dehydrogenase family member 9, mitochondrial ( <i>Tribolium castaneum</i> )                                                                       |
| DN811                           | 2224 | Acyl-CoA dehydrogenase          | gi 91088951 ref XP_973830.1 <br>PREDICTED: short-chain specific acyl-CoA dehydrogenase, mitochondrial ( <i>Tribolium castaneum</i> )              |
| DN9993                          | 534  | Acyl-CoA dehydrogenase          | gi 662190906 ref XP_008468241.1 <br>PREDICTED: probable medium-chain specific acyl-CoA dehydrogenase, mitochondrial ( <i>Diaphorina citri</i> )   |
| DN10841                         | 2696 | Acyl-CoA dehydrogenase          | gi 91076006 ref XP_966406.1 <br>PREDICTED: very long-chain specific acyl-CoA dehydrogenase, mitochondrial ( <i>Tribolium castaneum</i> )          |
| DN1273                          | 1691 | Acyl-CoA dehydrogenase          | gi 91079744 ref XP_970506.1 <br>PREDICTED: probable medium-chain specific acyl-CoA dehydrogenase, mitochondrial ( <i>Tribolium castaneum</i> )    |
| DN13359                         | 326  | Acyl-CoA dehydrogenase          | gi 642938637 ref XP_008197587.1 <br>PREDICTED: short/branched chain specific acyl-CoA dehydrogenase, mitochondrial ( <i>Tribolium castaneum</i> ) |
| DN9959                          | 2483 | 3-ketoacyl-CoA thiolase         | gi 91087491 ref XP_968373.1 <br>PREDICTED: 3-ketoacyl-CoA thiolase, mitochondrial ( <i>Tribolium castaneum</i> )                                  |
| DN16536                         | 474  | 3-ketoacyl-CoA thiolase         | gi 663287133 ref XP_008500452.1 <br>PREDICTED: 3-ketoacyl-CoA thiolase, peroxisomal ( <i>Calypte anna</i> )                                       |
| 3-hydroxyacyl-CoA dehydrogenase |      |                                 |                                                                                                                                                   |
| DN164                           | 3279 | 3-hydroxyacyl-CoA dehydrogenase | gi 91078584 ref XP_971954.1 <br>PREDICTED: 3-hydroxyacyl-CoA dehydrogenase type-2 ( <i>Tribolium castaneum</i> )                                  |
| enoyl-CoA hydratase             |      |                                 |                                                                                                                                                   |
| DN3785                          | 1584 | 3-hydroxyacyl-CoA dehydrogenase | gi 91076844 ref XP_974775.1 <br>PREDICTED: probable enoyl-CoA hydratase ( <i>Tribolium castaneum</i> )                                            |



se

|         |      |                                 |                                                                                                                                          |
|---------|------|---------------------------------|------------------------------------------------------------------------------------------------------------------------------------------|
| DN10753 | 1604 | Desaturase                      | gi 328722879 ref XP_003247697.1 <br>PREDICTED: acyl-CoA Delta (11)<br>desaturase isoform X1 ( <i>Acyrtosiphon<br/>pisum</i> )            |
| DN14591 | 2190 | Desaturase                      | gi 302371202 ref NP_001180578.1 <br>Z9 acyl-CoA desaturase B ( <i>Tribolium<br/>castaneum</i> )                                          |
| DN35858 | 786  | Desaturase                      | gi 768419096 ref XP_011550250.1 <br>PREDICTED: stearyl-CoA<br>desaturase 5-like ( <i>Plutella xylostella</i> )                           |
| DN4192  | 2745 | Desaturase                      | gi 984880662 ref NP_001306191.1 <br>acyl-CoA Delta(11) desaturase<br>( <i>Tribolium castaneum</i> )                                      |
| DN6011  | 2756 | Desaturase                      | gi 907678927 ref XP_013106080.1 <br>PREDICTED: acyl-CoA Delta(11)<br>desaturase ( <i>Stomoxys calcitrans</i> )                           |
| DN7337  | 1764 | Desaturase                      | gi 1000734683 ref XP_015589799.1 <br>PREDICTED: acyl-CoA Delta(11)<br>desaturase isoform X1 ( <i>Cephus<br/>cinctus</i> )                |
| DN748   | 2342 | Desaturase                      | gi 984880672 ref NP_001306192.1 <br>acyl-CoA Delta(11) desaturase-like<br>( <i>Tribolium castaneum</i> )                                 |
| DN1161  | 2785 | Fatty acyl-<br>CoA<br>reductase | gi 642916861 ref XP_008199532.1 <br>PREDICTED: putative fatty acyl-<br>CoA reductase CG5065 isoform X2<br>( <i>Tribolium castaneum</i> ) |
| DN12539 | 2315 | Fatty acyl-<br>CoA<br>reductase | gi 1008443007 ref XP_008194927.2 <br>PREDICTED: fatty acyl-CoA<br>reductase 1 isoform X1 ( <i>Tribolium<br/>castaneum</i> )              |
| DN12880 | 1378 | Fatty acyl-<br>CoA<br>reductase | gi 189239820 ref XP_971534.2 <br>PREDICTED: putative fatty acyl-<br>CoA reductase CG5065 ( <i>Tribolium<br/>castaneum</i> )              |
| DN12939 | 2465 | Fatty acyl-<br>CoA<br>reductase | gi 985386804 ref XP_015371677.1 <br>PREDICTED: putative fatty acyl-<br>CoA reductase CG5065 ( <i>Diuraphis<br/>noxia</i> )               |
| DN17133 | 303  | Fatty acyl-<br>CoA              | gi 939637560 ref XP_014294630.1 <br>PREDICTED: putative fatty acyl-                                                                      |

|         |      |                          |                                                                                                                       |
|---------|------|--------------------------|-----------------------------------------------------------------------------------------------------------------------|
|         |      | reductase                | CoA reductase CG5065, partial ( <i>Halyomorpha halys</i> )                                                            |
| DN18398 | 850  | Fatty acyl-CoA reductase | gi 91087837 ref XP_967757.1  PREDICTED: putative fatty acyl-CoA reductase CG5065 ( <i>Tribolium castaneum</i> )       |
| DN18398 | 935  | Fatty acyl-CoA reductase | gi 817187712 ref XP_012288416.1  PREDICTED: fatty acyl-CoA reductase 1 ( <i>Orussus abietinus</i> )                   |
| DN2670  | 2084 | Fatty acyl-CoA reductase | gi 91085011 ref XP_973467.1  PREDICTED: putative fatty acyl-CoA reductase CG8306 ( <i>Tribolium castaneum</i> )       |
| DN33105 | 2209 | Fatty acyl-CoA reductase | gi 1008441937 ref XP_015836217.1  PREDICTED: fatty acyl-CoA reductase 1 isoform X2 ( <i>Tribolium castaneum</i> )     |
| DN36061 | 884  | Fatty acyl-CoA reductase | gi 951561237 ref XP_014479570.1  PREDICTED: putative fatty acyl-CoA reductase CG5065 ( <i>Dinoponera quadriceps</i> ) |
| DN4075  | 2799 | Fatty acyl-CoA reductase | gi 189238048 ref XP_001811309.1  PREDICTED: putative fatty acyl-CoA reductase CG5065 ( <i>Tribolium castaneum</i> )   |
| DN4372  | 2406 | Fatty acyl-CoA reductase | gi 189239820 ref XP_971534.2  PREDICTED: putative fatty acyl-CoA reductase CG5065 ( <i>Tribolium castaneum</i> )      |
| DN4479  | 1174 | Fatty acyl-CoA reductase | gi 659495078 gb AID66650.1  fatty acyl reductase ( <i>Agrotis segetum</i> )                                           |
| DN4898  | 2435 | Fatty acyl-CoA reductase | gi 270008526 gb EFA04974.1  Putative fatty acyl-CoA reductase CG5065-like Protein ( <i>Tribolium castaneum</i> )      |
| DN50015 | 389  | Fatty acyl-CoA reductase | gi 985386804 ref XP_015371677.1  PREDICTED: putative fatty acyl-CoA reductase CG5065 ( <i>Diuraphis noxia</i> )       |
| DN510   | 1975 | Fatty acyl-CoA reductase | gi 572270973 ref XP_006613464.1  PREDICTED: putative fatty acyl-CoA reductase CG5065-like ( <i>Apis dorsata</i> )     |

|         |      |                                     |                                                                                                                                   |
|---------|------|-------------------------------------|-----------------------------------------------------------------------------------------------------------------------------------|
| DN6636  | 2182 | Fatty acyl-CoA reductase            | gi 91084843 ref XP_966905.1 <br>PREDICTED: putative fatty acyl-CoA reductase CG5065 ( <i>Tribolium castaneum</i> )                |
| DN666   | 3915 | Fatty acyl-CoA reductase            | gi 91084571 ref XP_973790.1 <br>PREDICTED: putative fatty acyl-CoA reductase CG5065 ( <i>Tribolium castaneum</i> )                |
| DN7489  | 2261 | Fatty acyl-CoA reductase            | gi 189239820 ref XP_971534.2 <br>PREDICTED: putative fatty acyl-CoA reductase CG5065 ( <i>Tribolium castaneum</i> )               |
| DN9924  | 1623 | Fatty acyl-CoA reductase            | gi 91087837 ref XP_967757.1 <br>PREDICTED: putative fatty acyl-CoA reductase CG5065 ( <i>Tribolium castaneum</i> )                |
| DN5736  | 1725 | acyl-CoA-binding protein            | gi 91090704 ref XP_974824.1 <br>PREDICTED: putative acyl-CoA-binding protein ( <i>Tribolium castaneum</i> )                       |
| DN1181  | 5019 | acyl-CoA-binding protein            | gi 676433961 ref XP_009047071.1 <br>hypothetical protein<br>LOTGIDRAFT_205113 ( <i>Lottia gigantea</i> )                          |
| DN13258 | 2520 | acetyl-CoA acetyltransferase (ACAT) | gi 983657959 gb AMB37467.1 <br>acetyl-CoA acetyltransferase 2<br>( <i>Leptinotarsa decemlineata</i> )                             |
| DN7232  | 1958 | acetyl-CoA acetyltransferase (ACAT) | gi 189234785 ref XP_975008.2 <br>PREDICTED: acetyl-CoA acetyltransferase, mitochondrial isoform X1 ( <i>Tribolium castaneum</i> ) |

## Reference

1. Zhang, M.; Du, M.-Y.; Wang, G.-X.; Wang, Z.-Y.; Lu, Y.-J. Identification, mRNA expression, and functional analysis of chitin synthase 2 gene in the rusty grain beetle, *Cryptolestes ferrugineus*. *J. Stored Prod. Res.* **2020**, *87*, 101622. <https://doi.org/10.1016/j.jspr.2020.101622>.
